# Supplementary material
Source: PubMed Central journal article supplement (PMC6657499)
Supplement: NIHMS870407-supplement-Supplement_2.pdf [file NIHMS870407-supplement-Supplement_2.pdf]

## Supplementary Online Content

Morris PE, Berry MJ, Files DC, et al. Effect of standardized rehabilitation on hospital length of stay among patients with acute respiratory failure: a randomized clinical trial. *JAMA*. doi:10.1001/jama.2016.7201

**eTable 1.** Discharge Destinations

**eTable 2.** Baseline Characteristics of Those Participants With and Without any Follow-up as an Outpatient

**eTable 3.** Baseline Characteristics of Those Participants With and Without 6-Month Follow-up as an Outpatient

**eTable 4.** Adverse Events

This supplementary material has been provided by the authors to give readers additional information about their work.

eTable 1. Discharge Destinations

| Location | Standardized<br>Rehabilitation Therapy<br>(N=131) | Usual Care<br>(N=126) | Total<br>(N=257) |
|----------|---------------------------------------------------|-----------------------|------------------|
| Home     | 107 (81.7)                                        | 105 (83.3)            | 212 (82.5)       |
| Rehab    | 6 (4.6)                                           | 6 (4.8)               | 12 (4.7)         |
| SNF      | 9 (6.9)                                           | 12 (9.5)              | 21 (8.2)         |
| Hospice  | 2 (1.5)                                           | 2 (1.6)               | 4 (1.6)          |
| Other    | 7 (5.3)                                           | 1 (0.8)               | 8 (3.1)          |
|          |                                                   |                       |                  |
| Total    | 131                                               | 126                   | 257              |

Rehab = Rehabilitation Facility, SNF = Skilled Nursing Facility

eTable 2. Baseline Characteristics of those participants with and without any follow up as an Outpatient

|                                                                    | No Follow-up<br>Mean (SD) or<br>No. (%) |                |             | Some Follow-up<br>Mean (SD) or<br>No. (%) |                |             |
|--------------------------------------------------------------------|-----------------------------------------|----------------|-------------|-------------------------------------------|----------------|-------------|
|                                                                    | SRT<br>(N=51)                           | UC<br>(N=61)   | P-<br>value | SRT<br>(N=99)                             | UC<br>(N=89)   | P-<br>value |
| Age, years                                                         | 54.6<br>(16.7)                          | 61.0<br>(14.6) | 0.03        | 54.9<br>(16.6)                            | 56.3<br>(13.4) | 0.54        |
| Gender %female                                                     | 34<br>(66.7%)                           | 31<br>(50.8%)  | 0.09        | 50<br>(50.5%)                             | 51<br>(57.3%)  | 0.35        |
| Race/Ethnicity                                                     |                                         |                | 0.68        |                                           |                | 0.99        |
| Hispanic or Latino                                                 | 0<br>(0.0%)                             | 0<br>(0.0%)    |             | 2<br>(2.0%)                               | 2<br>(2.2%)    |             |
| Black or African American                                          | 9<br>(17.6%)                            | 9<br>(14.8%)   |             | 24<br>(24.2%)                             | 22<br>(24.7%)  |             |
| Caucasian                                                          | 42<br>(82.4%)                           | 52<br>(85.2%)  |             | 73<br>(73.7%)                             | 65<br>(73.0%)  |             |
| APACHE III Score                                                   | 80.2<br>(30.6)                          | 87.6<br>(26.6) | 0.17        | 74.4<br>(24.0)                            | 66.8<br>(24.6) | 0.03        |
| ICU Diagnosis                                                      |                                         |                | 0.16        |                                           |                | 0.32        |
| Coma                                                               | 1<br>(2.0%)                             | 2<br>(3.3%)    |             | 0<br>(0.0%)                               | 2<br>(2.2%)    |             |
| Acute Respiratory Failure<br>(ARF) without Chronic<br>Lung Disease | 35<br>(68.6%)                           | 50<br>(82.0%)  |             | 63<br>(63.6%)                             | 55<br>(61.8%)  |             |
| ARF with Chronic Lung<br>Disease                                   | 15<br>(29.4%)                           | 9<br>(14.8%)   |             | 36<br>(36.4%)                             | 32<br>(36.0%)  |             |
| Home Oxygen                                                        | 9<br>(17.6%)                            | 10<br>(16.4%)  | 0.86        | 23<br>(23.2%)                             | 17<br>(19.1%)  | 0.49        |
| Dialysis Pre-hospital                                              | 3<br>(5.9%)                             | 6<br>(9.8%)    | 0.44        | 10<br>(10.1%)                             | 5<br>(5.6%)    | 0.26        |
| Mean Arterial Pressure<br>(mmHg)                                   | 74.9<br>(22.3)                          | 68.4<br>(19.1) | 0.10        | 76.8<br>(22.3)                            | 78.0<br>(24.0) | 0.73        |

|                                      |                 |                 |      |                 |                 |      |
|--------------------------------------|-----------------|-----------------|------|-----------------|-----------------|------|
| PaCO <sub>2</sub> (mmHg)             | 45.3<br>(20.7)  | 42.0<br>(13.8)  | 0.32 | 43.9<br>(16.9)  | 45.0<br>(17.6)  | 0.67 |
| PaO <sub>2</sub> /FiO <sub>2</sub>   | 175.7<br>(86.2) | 163.3<br>(92.9) | 0.47 | 185.3<br>(78.7) | 183.2<br>(81.2) | 0.86 |
| Non-invasive ventilation at baseline | 4<br>(7.8%)     | 1<br>(1.6%)     | 0.11 | 7<br>(7.1%)     | 9<br>(10.1%)    | 0.46 |
| ICU-free days*                       | 12.2<br>(11.3)  | 12.5<br>(10.4)  | 0.90 | 17.9<br>(7.3)   | 19.3<br>(6.4)   | 0.17 |

\*ICU-free days through day 28. APACHE III<sup>33</sup> Score range is from 0 to 299. A higher score indicates an increased risk of mortality.

eTable 3. Baseline Characteristics of those participants with and without 6 month follow up as an Outpatient

|                                                                    | No 6 Month Follow-up    |                |             | 6 Month Follow-up       |                |             |
|--------------------------------------------------------------------|-------------------------|----------------|-------------|-------------------------|----------------|-------------|
|                                                                    | Mean (SD) or<br>No. (%) |                |             | Mean (SD) or<br>No. (%) |                |             |
|                                                                    | SRT<br>(N=66)           | UC<br>(N=69)   | P-<br>value | SRT<br>(N=84)           | UC<br>(N=81)   | P-<br>value |
| Age, years                                                         | 55.2<br>(16.6)          | 60.5<br>(14.7) | 0.05        | 54.5<br>(16.7)          | 56.3<br>(13.2) | 0.45        |
| Gender %female                                                     | 41<br>(62.1%)           | 32<br>(46.4%)  | 0.07        | 43<br>(51.2%)           | 50<br>(61.7%)  | 0.17        |
| Race/Ethnicity                                                     |                         |                | 0.62        |                         |                | 0.83        |
| Hispanic or Latino                                                 | 0<br>(0.0%)             | 1<br>(1.4%)    |             | 2<br>(2.4%)             | 1<br>(1.2%)    |             |
| Black or African American                                          | 11<br>(16.7%)           | 11<br>(15.9%)  |             | 22<br>(26.2%)           | 20<br>(24.7%)  |             |
| Caucasian                                                          | 55<br>(83.3%)           | 57<br>(82.6%)  |             | 60<br>(71.4%)           | 60<br>(74.1%)  |             |
| APACHE III Score                                                   | 76.8<br>(29.5)          | 84.7<br>(27.2) | 0.11        | 76.1<br>(24.0)          | 67.3<br>(25.0) | 0.02        |
| ICU Diagnosis                                                      |                         |                | 0.04        |                         |                | 0.29        |
| Coma                                                               | 1<br>(1.5%)             | 2<br>(2.9%)    |             | 0<br>(0.0%)             | 2<br>(2.5%)    |             |
| Acute Respiratory Failure<br>(ARF) without Chronic<br>Lung Disease | 41<br>(62.1%)           | 55<br>(79.7%)  |             | 57<br>(67.9%)           | 50<br>(61.7%)  |             |
| ARF with Chronic Lung<br>Disease                                   | 24<br>(36.4%)           | 12<br>(17.4%)  |             | 27<br>(32.1%)           | 29<br>(35.8%)  |             |
| Home Oxygen                                                        | 14<br>(21.2%)           | 11<br>(15.9%)  | 0.43        | 18<br>(21.4%)           | 16<br>(19.8%)  | 0.79        |
| Dialysis Pre-hospital                                              | 4<br>(6.1%)             | 6<br>(8.7%)    | 0.56        | 9<br>(10.7%)            | 5<br>(6.2%)    | 0.30        |
| Mean Arterial Pressure<br>(mmHg)                                   | 76.1<br>(21.6)          | 70.6<br>(20.3) | 0.13        | 76.2<br>(22.9)          | 77.1<br>(24.0) | 0.82        |

|                                      |                 |                 |      |                 |                 |      |
|--------------------------------------|-----------------|-----------------|------|-----------------|-----------------|------|
| PaCO <sub>2</sub> (mmHg)             | 46.3<br>(19.7)  | 43.9<br>(14.9)  | 0.43 | 42.9<br>(16.9)  | 43.6<br>(17.4)  | 0.77 |
| PaO <sub>2</sub> /FiO <sub>2</sub>   | 172.6<br>(79.0) | 162.2<br>(90.3) | 0.48 | 189.4<br>(82.5) | 186.2<br>(81.9) | 0.80 |
| Non-invasive ventilation at baseline | 7<br>(10.6%)    | 3<br>(4.3%)     | 0.17 | 4<br>(4.8%)     | 7<br>(8.6%)     | 0.32 |
| ICU-free days*                       | 13.9<br>(11.1)  | 12.5<br>(10.3)  | 0.44 | 17.5<br>(7.3)   | 20.0<br>(5.7)   | 0.02 |

\*ICU-free days through day 28. APACHE III<sup>33</sup> Score range is from 0 to 299. A higher score indicates an increased risk of mortality.

eTable 4. Adverse Events

|                                                        | SRT        | UC        | Overall    |
|--------------------------------------------------------|------------|-----------|------------|
| # Participants                                         | 150        | 150       | 300        |
| # Participants with AE's                               | 7 (4.7%)   | 11 (7.3%) | 18 (6.0%)  |
| AE's per Participant                                   |            |           |            |
| 1                                                      | 6          | 10        | 16         |
| 3                                                      | -          | 1         | 1          |
| 5                                                      | 1          | -         | 1          |
| # Events                                               | 11         | 13        | 24         |
| Severity                                               |            |           |            |
| Mild                                                   | 1 (9.1%)   | 2 (15.4%) | 3 (12.5%)  |
| Moderate                                               | 5 (45.5%)  | 8 (61.5%) | 13 (54.2%) |
| Severe                                                 | 4 (36.4%)  | 3 (23.1%) | 7 (29.2%)  |
| Life threatening                                       | 1 (9.1%)   | 0 (0%)    | 1 (4.2%)   |
| Specific Protocol-Mandated Intervention-related Events |            |           |            |
| Death                                                  | 0          | NA        | 0          |
| Device Removal                                         | 0          | NA        | 0          |
| Re-Intubation                                          | 0          | NA        | 0          |
| Patient Falls                                          | 0          | NA        | 0          |
| # Events                                               | 11         | 13        | 24         |
| Relationship                                           |            |           |            |
| Not Related                                            | 10 (90.9%) | 13 (100%) | 23 (95.8%) |
| Remotely                                               | 0 (0%)     | 0 (0%)    | 0 (0%)     |
| Possible                                               | 1 (9.1%)   | 0 (0%)    | 1 (4.2%)   |
| Probable/Definite                                      | 0 (0%)     | 0 (0%)    | 0 (0%)     |

AE = Adverse Events; Relationship = occurring during the delivery of the Standardized Rehabilitation Therapy sessions. NA= not applicable. Severity were consistent with National Institutes of Health guidelines (please see on-line protocol document and [https://www.nia.nih.gov/sites/default/files/niaaeandsaeguidelinesfinal011012\\_0.doc.](https://www.nia.nih.gov/sites/default/files/niaaeandsaeguidelinesfinal011012_0.doc.), last accessed 5-27-2016)
